# Supplementary material
Source: ML conference proceedings conference paper supplement (https://proceedings.neurips.cc/paper_files/paper/2023/hash/56a225639da77e8f7c0409f6d5ba996b-Abstract.html)
Supplement: Supplementary file 1 [file 56a225639da77e8f7c0409f6d5ba996b-Supplemental-Conference.pdf]

## 482 A Proofs

483 **Lemma 15** (A one-step good policy is close to optimal). *Let  $\Delta(h) := |V_\xi^*(h) - V_\xi^\pi(h)|$  with*  
 484  *$h \in (\mathcal{A} \times \mathcal{E})^t$  for  $t \geq t_0 \in \mathbb{N}$ .*

$$\begin{aligned} & \text{If } \mathbb{E}_\xi^\pi |\max_a Q_\xi^\pi(h, a) - V_\xi^\pi(h)| < \beta \quad \forall t \geq t_0 \\ & \text{and } \mathbb{E}_\xi^\pi [\max_a \sum_e \xi(e|ha) \Delta(hae)] \leq (1 + \alpha) \mathbb{E}_\xi^\pi \Delta(hae) \quad \forall t \geq t_0 \\ & \text{then } \mathbb{E}_\xi^\pi \Delta(h) < \frac{\beta}{1 - \gamma(1 + \alpha)} \quad \forall t \geq t_0 \quad \text{provided } 1 + \alpha < 1/\gamma \end{aligned}$$

485 *Proof.* Let  $\delta := \sup_{t \geq t_0} \mathbb{E} \Delta(h)$ , where  $h \in (\mathcal{A} \times \mathcal{E})^t$  and  $\mathbb{E}$  is short for  $\mathbb{E}_\xi^\pi$ .

$$\begin{aligned} \mathbb{E} \Delta(h) &= \left| \max_a Q_\xi^*(h, a) - V_\xi^\pi(h) \right| \\ &= \mathbb{E} \left| \max_a Q_\xi^*(h, a) - \max_a Q_\xi^\pi(h, a) + \max_a Q_\xi^\pi(h, a) - V_\xi^\pi(h) \right| \\ &\leq \mathbb{E} \left| \max_a Q_\xi^\pi(h, a) - V_\xi^\pi(h) \right| + \mathbb{E} \left| \max_a Q_\xi^*(h, a) - \max_a Q_\xi^\pi(h, a) \right| \\ &\stackrel{(1)}{<} \beta + \mathbb{E} \left| \max_a \sum_e \xi(e|ha) (r + \gamma V_\xi^*(hae)) - \max_a \sum_e \xi(e|ha) (r + \gamma V_\xi^\pi(hae)) \right| \\ &\leq \beta + \gamma \mathbb{E} \max_a \sum_e \xi(e|ha) |V_\xi^*(hae) - V_\xi^\pi(hae)| \\ &\leq \beta + \gamma(1 + \alpha) \mathbb{E} \Delta(hae) \end{aligned}$$

486 Taking  $\sup_{t \geq t_0}$  on both sides implies  $\delta < \beta + \gamma(1 + \alpha)\delta$  implies  $\delta < \beta/(1 - \gamma(1 + \alpha))$ .  $\square$   $\square$

487 **Lemma 17** ( $\mathbb{E}_\xi^\pi \rightarrow 0$  implies  $\mathbb{E}_\mu^\pi \rightarrow 0$ ). *If  $\pi$  is such that*

$$\mathbb{E}_\xi^\pi [V_\xi^*(h_{<t}) - V_\xi^\pi(h_{<t})] \rightarrow 0 \quad \text{as } t \rightarrow \infty.$$

488 *then for all  $\mu \in \mathcal{M}$  we have*

$$\mathbb{E}_\mu^\pi [V_\xi^*(h_{<t}) - V_\xi^\pi(h_{<t})] \rightarrow 0 \quad \text{as } t \rightarrow \infty.$$

*Proof.*

$$\mathbb{E}_\mu^\pi [V_\xi^*(h_{<t}) - V_\xi^\pi(h_{<t})] \leq \frac{1}{w(\mu)} \mathbb{E}_\xi^\pi [V_\xi^*(h_{<t}) - V_\xi^\pi(h_{<t})] \rightarrow 0$$

489 by the dominance of  $\xi(\cdot) \geq w(\mu)\mu(\cdot)$ .  $\square$

490 **Lemma 20** ( $V_\xi^{\pi'} \rightarrow V_\xi^\pi$  implies  $V_\mu^{\pi'} \rightarrow V_\mu^\pi$  in  $\mu$ -expectation). *If  $\pi$  is such that for all  $\mu \in \mathcal{M}$*

$$\mathbb{E}_\mu^\pi [V_\xi^{\pi'}(h_{<t}) - V_\xi^\pi(h_{<t})] \rightarrow 0 \quad \text{as } t \rightarrow \infty.$$

491 *and  $D_\infty(\mu^{\pi'}, \xi^{\pi'} | h_{<t}) \rightarrow 0$   $\mu^\pi$ -almost surely then we have*

$$\mathbb{E}_\mu^\pi [V_\mu^{\pi'}(h_{<t}) - V_\mu^\pi(h_{<t})] \rightarrow 0 \quad \text{as } t \rightarrow \infty.$$

*Proof.*

$$\begin{aligned} & \mathbb{E}_\mu^\pi [|V_\mu^{\pi'}(h_{<t}) - V_\mu^\pi(h_{<t})|] \\ &= \mathbb{E}_\mu^\pi [|V_\mu^{\pi'}(h_{<t}) - V_\xi^{\pi'}(h_{<t}) + V_\xi^{\pi'}(h_{<t}) - V_\xi^\pi(h_{<t}) + V_\xi^\pi(h_{<t}) - V_\mu^\pi(h_{<t})|] \\ &\leq \mathbb{E}_\mu^\pi [|V_\mu^{\pi'}(h_{<t}) - V_\xi^{\pi'}(h_{<t})|] + \mathbb{E}_\mu^\pi [|V_\xi^{\pi'}(h_{<t}) - V_\xi^\pi(h_{<t})|] + \mathbb{E}_\mu^\pi [|V_\xi^\pi(h_{<t}) - V_\mu^\pi(h_{<t})|] \end{aligned}$$

492 The second and third term go to 0 as  $t \rightarrow \infty$  by the assumptions and Lemma 3 with Lemma 13. The  
 493 first term goes to 0 as  $D_\infty(\mu^{\pi'}, \xi^{\pi'} | h_{<t}) \rightarrow 0$   $\mu^\pi$ -almost surely implies  $\mathbb{E}_\mu^\pi [D_\infty(\mu^{\pi'}, \xi^{\pi'} | h_{<t})] \rightarrow 0$   
 494 and we have  $\mathbb{E}_\mu^\pi [ |V_\mu^{\pi'}(h_{<t}) - V_\xi^{\pi'}(h_{<t})| ] \leq \mathbb{E}_\mu^\pi [D_\infty(\mu^{\pi'}, \xi^{\pi'} | h_{<t})]$ .

495

□

496 **Theorem 22** (Self-AIXI is Self-optimizing). *Let  $\mu$  be some environment. If there is a policy*  
 497  *$\pi$  and a sequence of policies  $\bar{\pi}_1, \bar{\pi}_2, \dots$  all contained within  $\mathcal{P}$  such that for all  $t, h_{<t}$  we have*  
 498  *$V_\xi^\zeta(h_{<t}) \geq V_\xi^{\bar{\pi}_t}(h_{<t}) - \epsilon_t$  with  $\epsilon_t \rightarrow 0$ , and for all  $\nu \in \mathcal{M}$*

$$V_\nu^*(h_{<t}) - V_\nu^{\bar{\pi}_t}(h_{<t}) \rightarrow 0 \quad \text{as } t \rightarrow \infty \quad \mu^\pi\text{-almost surely} \quad (4)$$

499 then

$$V_\nu^*(h_{<t}) - V_\nu^{\pi_S}(h_{<t}) \rightarrow 0 \quad \text{as } t \rightarrow \infty \quad \mu^\pi\text{-almost surely}$$

500 If  $\pi = \pi_S$  and Equation 4 holds for all  $\mu \in \mathcal{M}$ , then  $\pi_S$  is strongly asymptotically optimal in the  
 501 class  $\mathcal{M}$ .

*Proof.*

$$0 \leq w(\mu | h_{<t}) (V_\mu^*(h_{<t}) - V_\mu^{\pi_S}(h_{<t})) \quad (5)$$

$$\leq \sum_{\nu \in \mathcal{M}} w(\nu | h_{<t}) (V_\nu^*(h_{<t}) - V_\nu^{\pi_S}(h_{<t})) \quad (6)$$

$$= \sum_{\nu \in \mathcal{M}} w(\nu | h_{<t}) V_\nu^*(h_{<t}) - V_\xi^{\pi_S}(h_{<t}) \quad (7)$$

$$\leq \sum_{\nu \in \mathcal{M}} w(\nu | h_{<t}) V_\nu^*(h_{<t}) - V_\xi^\zeta(h_{<t}) \quad (8)$$

$$\leq \sum_{\nu \in \mathcal{M}} w(\nu | h_{<t}) V_\nu^*(h_{<t}) - V_\xi^{\bar{\pi}_t}(h_{<t}) + \epsilon_t \quad (9)$$

$$= \sum_{\nu \in \mathcal{M}} w(\nu | h_{<t}) (V_\nu^*(h_{<t}) - V_\nu^{\bar{\pi}_t}(h_{<t})) + \epsilon_t \quad (10)$$

$$\rightarrow 0 \quad (11)$$

502 Equation 6 comes from adding positive terms. Equations 7 and 10 comes from the linearity of the  
 503 value function. Equation 8 comes from  $\pi_S$  being one step optimal then following  $\zeta$  and . Equation 9  
 504 comes from the assumptions. Lastly, 11 comes from Equation 4 and [14, Lem.5.28ii].

505  $w(\mu | h_{<t}) \rightarrow 0$  as  $h_{<t}$  is generated from  $\mu^\pi$  (for more details see Self-Optimizing proof in [14]).  
 506 Therefore  $V_\mu^*(h_{<t}) - V_\mu^{\pi_S}(h_{<t}) \rightarrow 0$   $\mu^\pi$ -almost surely.

507

□
